1 **Resistance levels to the cassava green mite, *Mononychellus***  
2 ***tanajoa*, in cassava germplasm (*Manihot esculenta*)**

3

4 **Jaime Marín<sup>1,3\*</sup>, Arturo Carabali<sup>2</sup> & James Montoya Lerma<sup>1</sup>**

5

6 <sup>1</sup> Departamento de Biología, Universidad del Valle, Cali, Colombia

7 <sup>2</sup> Corporación Colombiana de Investigación Agropecuaria (Agrosavia), Palmira, Colombia

8 <sup>3</sup> Corporación Colombiana de Investigación Agropecuaria (Agrosavia), Espinal, Colombia

9 \*Actual address for correspondence: [jamarin@agrosavia.co](mailto:jamarin@agrosavia.co)

10

11

12 **Abstract**

13 The cassava green mite (CGM), *Mononychellus tanajoa* (Acari: Tetranychidae), is one of the  
14 main pests of cassava, causing direct damage by sucking the plant's sap. Although the mite  
15 has a wide distribution in Latin America and Africa and a high potential to expand to Asia,  
16 limited information is available on *M. tanajoa* biology and life history parameters on its  
17 primary host. In this study, we quantified the levels of resistance of 10 cassava genotypes  
18 (i.e., NAT-31, ALT-12, ALT-6, COL-1505, ECU-72, ECU-160, PER-182, PER-335, 60444,  
19 CMC-40) based on the mite's oviposition preference and development time in no-choice and  
20 choice bioassays. The genotype NAT-31 significantly differed from other genotypes for *M.*  
21 *tanajoa* development time and oviposition rate: each stage of the CGM life cycle appeared to  
22 be delayed in NAT-31, suggesting that NAT-31 resistance is mediated through a general  
23 reduction of CGM fitness on this genotype. Resistance in the remaining genotypes was  
24 variable in comparison to a susceptible (control) genotype. ECU-72, a parental line of NAT-  
25 31, present a difference related to oviposition preference, development time and sex ratio.  
26 These parameters allow the identification of different levels of resistance (antixenotic and  
27 antibiosis) when compared to the susceptible genotype. CGM displayed significantly different  
28 oviposition preference from the susceptible genotypes. Identification and characterization of  
29 resistance to CGM in cassava germplasm might be key to further advance knowledge about  
30 natural resistance mechanisms and develop strategies to introgress resistance to CGM in  
31 farmer- and industry-preferred cassava varieties.

32

33 **Key words:** CGM, cassava green mite, cassava, resistance, pest, oviposition

34

## 35 **Introduction**

36 Cassava (*Manihot esculenta* Crantz, Euphorbiaceae) is a woody perennial shrub originating  
37 from South America (Olsen and Schaal, 1999). With a total world production of over 280  
38 million tons in 2012, it constitutes an essential source of carbohydrates for about 800 million  
39 people in tropical countries (FAO, 2012; FAOSTAT, 2009; Lebot, 2009). In addition to its  
40 use in human diets, cassava is widely used as a raw material in processed products as well as  
41 for the animal feed, ethanol and starch industries (Anggraini *et al.*, 2009; Balagopalan 2002).

42       Approximately 200 species of arthropod pests are associated with cassava (Bellotti *et*  
43 *al.*, 2002, 2010, 2012). Green mites [cassava green mite (CGM), *Mononychellus tanajoa*  
44 (Bondar), and *Mononychellus caribbeanae* (McGregor)], whiteflies (*Aleurotrachelus socialis*,  
45 *Bemisia tabaci* and *Aleurothrixus aepim*) and mealybugs (*Phenacoccus manihoti*) are among  
46 the most important arthropod pests infecting cassava (Parsa *et al.*, 2015; Bellotti, 2002). These  
47 pest species, almost all native from the Neotropics, have adapted in various forms to the  
48 physical and biochemical defences of the plant, including its leaf pubescence and its  
49 laticiferous and cyanogenic compounds (Bellotti and Riis, 1994). Green mites and mealybugs  
50 negatively impact cassava yield by feeding on the terminal parts of the plants triggering cell  
51 death and reduced photosynthesis (Gomez *et al.*, 2001). Field research has indicated that  
52 extended attacks (i.e., between 3 and 6 months) of *M. tanajoa* can cause up to 80% losses in  
53 root yields (Bellotti *et al.*, 2012). *Mononychellus tanajoa* attacks are favoured by dry  
54 conditions, in unfertile plants, inadequate fertilisation and the presence of weeds (Bellotti *et al.*,  
55 2012). Whereas *M. tanajoa* presently affects several of the world's prime cassava-growing  
56 areas, climate change and continued global spread have been predicted to further exacerbate  
57 mite pest problems in the African rift valley, the Mato Grosso in Brazil, northern South  
58 America and Southeast Asia (Herrera *et al.*, 2011). The vast majority of cassava farmers tend  
59 to use insecticides to control CGM (CIAT, 2006; Arias, 1995). However, efficacy of spraying  
60 against this mite is usually limited, and multiple applications are required to keep CGM  
61 populations under control, making the crop economically unsustainable in regions where  
62 green mites are endemic (Panda and Khush, 1995). Biological control relying on the use of  
63 naturally occurring predators and entomopathogens as well as the deployment of mite-  
64 resistant cassava varieties are effective and complementary methods that may be used to  
65 manage *M. tanajoa* (Bellotti *et al.*, 2012).

66       Wild relatives of cassava constitute important sources of genes for resistance against  
67 cassava arthropod pests (Vargas *et al.*, 2002; Burbano *et al.*, 2007; Carabali *et al.*, 2010a, b;

68 Parsa *et al.*, 2015). Moderate to high levels of resistance to green mites, whiteflies and  
69 mealybugs were identified in inter-specific hybrids of *M. esculenta* subsp. (CIAT, 2006;  
70 Carabalí *et al.* 2010a, 2013). Furthermore, resistance to CGM was transferred to F<sub>1</sub> inter-  
71 specific hybrids, suggesting a simple inheritance of this trait (A. Bellotti and M. Fregene,  
72 pers. comm.). However, the long reproductive cycle and lengthy time required to develop new  
73 cassava varieties (8-10 years) often discourages the use of wild species in conventional  
74 cassava breeding programs (Rudy *et al.*, 2010; Legg *et al.*, 2006). A preliminary assessment  
75 by Parsa *et al.* (2015) reported 33 potential sources of resistance to *M. tanajoa* in the cassava  
76 germplasm. Robust assessment of resistance levels to CGM in the cassava germplasm as well  
77 as identification of different types of resistance are urgently needed to develop and deploy  
78 sustainable management of CGM resistance in the field. Characterization of the CGM  
79 resistance is also essential to help understanding the associated physiological and phenotypic  
80 traits. In the present study we report on the assessment of resistance levels to CGM of selected  
81 cassava breeding lines. We used bioassays and measured biological parameters such as  
82 oviposition preference, development time and sex ratio to estimate the resistance level and to  
83 characterize the impact of resistant cassava host on CGM.

84

## 85 **MATERIALS AND METHODS**

### 86 *Plants and mites*

87 The study was conducted in 2012 in glasshouse facilities at the Universidad del Valle  
88 (Univalle) in Cali, Colombia ( $28 \pm 2^\circ\text{C}$ ,  $70 \pm 5\%$  relative humidity [RH]). Ten genotypes of  
89 *M. esculenta* (i.e., NAT-31, ALT-12, ALT-6, COL-1505, ECU-72, ECU-160, PER-182, PER-  
90 335, 60444, and CMC-40) were obtained from the CIAT germplasm bank. Genotypes were  
91 selected based on their potential or known levels of arthropod resistance/susceptibility (Table  
92 1). CMC-40 accession was used as a susceptible control and was also used as host plant for  
93 CGM colony maintenance (Bellotti, 2002, Bellotti *et al.*, 2010, 2012). All the genotypes were  
94 established *in vitro* and then planted in sterile soil in plastic pots and kept in a glasshouse at  
95  $30 \pm 2^\circ\text{C}$  and  $70 \pm 5\%$  RH. Plants were irrigated 3× per week and the plants did not receive  
96 pesticide or fertilizer applications. Six-month-old plants were used for the bioassays. A stock  
97 colony of *M. tanajoa*, isolated in the cassava fields at CIAT (Cali, Colombia), was established  
98 and reared on CMC-40 plants under controlled conditions ( $28 \pm 2^\circ\text{C}$ ,  $70 \pm 5\%$  RH and  
99 L12:D12 photoperiod) for the bioassays. Cassava green mites were placed on fresh cassava  
100 plants every 20 days. Hybrid vigor was guaranteed bringing mites from the field every 2  
101 months.

102

### 103 ***Bioassays***

104 Mite performance on the selected genotypes was evaluated using the following biological  
105 parameters: host plant selection, oviposition preference, development time and offspring sex  
106 ratio. First, in a preliminary trial, the 10 genotypes were screened, followed by a second trial  
107 using the five genotypes that were tolerant to CGM attack in the first trial. Due to reduced  
108 establishment rate using stem propagation for ALT-6, this genotype was not included in the  
109 second screening assay. In all cases, two sets of bioassays (choice and no-choice) were  
110 conducted.

111 Oviposition preference assays were based on choice and no-choice tests. The choice  
112 assay consisted of facing susceptible CMC-40 (control) genotype with the other nine  
113 genotypes in a Petri dish (200 × 15 mm). Lobes of each genotype were placed on top in a  
114 circle on foam moistened with water. In the choice assay, the position of the materials in the  
115 Petri dish was rotated clockwise, in order to guarantee independence and their random  
116 distribution. In the no-choice assays, 10 lobes of the same genotype were placed in a Petri  
117 dish. Experimental unit was the Petri dish with 10 lobes in the first assay (in total five Petri  
118 dishes, 50 replicates). For the second assay, the experimental unit was the same Petri dish but  
119 with five lobes (in total 10 Petri dishes, 50 replicates).

120

121 ***Oviposition preference.*** For the choice assays, a leaf lobe (average length 3 cm) of each  
122 genotype was placed on humid foam and then arranged in a circle inside a Petri dish (200 ×  
123 15 mm) as shown in Figure 1. Twenty pairs (male and female) of CGM adults, 24 h post  
124 emergence, were placed on CMC-40 leaf lobes at the centre of a Petri dish (50 for each  
125 genotype, 10 petri dishes with 10 lobes in each of the petri dishes.) (Figure 1A). For the no-  
126 choice assays, a similar procedure was followed with 20 pairs of mites per arena placed on  
127 CMC-40 leaf discs, but now each Petri dish contained only lobes of a single genotype (Figure  
128 1B) (one experimental run in which 20 mite pairs were released within a single Petri dish).

129 Oviposition was evaluated for eight (8) days and estimated as the average number of  
130 eggs laid per female on 50 lobes for each genotype (choice assays) and the average number of  
131 eggs laid per female on each genotype (no-choice). In each case, this was assessed counting  
132 the total number of eggs laid per female during twice observations per day. The two  
133 observations did not show statistical differences; hence for the analysis the total diaries were  
134 used. The free and non-free preference tests were carried out for 10 and 12 days. Count  
135 started from the petiole (upper rib) and continued in the lower part of the rib. The number of

136 eggs at 24h and 48h was compared in order to detect any early difference among genotypes.

137

138 ***Development time and sex ratio.*** Male and female mite adults, obtained from 6-month-old  
139 CMC-40 plants, were transferred to the underside of leaf lobes obtained from 6-month-old  
140 plants, kept on humid foam inside Petri dishes (200 × 15 mm). The average size of the lobes  
141 was 3 cm. After 12 h, the adults were eliminated, and eggs were randomly selected and  
142 removed with a needle and a fine brush. Only one egg was left to continue its development  
143 until reach adulthood. Observations were done every 2 h recording its physiological stage.  
144 Fifty lobes of each genotype were evaluated for egg to adult development time and offspring  
145 sex ratio.

146

#### 147 ***Statistical analysis***

148 Differences among the mean values in the no-choice and choice tests on the various  
149 genotypes were analysed using one-way ANOVA, followed by Tukey test for multiple mean  
150 comparison tests. ANOVA was used to detect differences in fecundity, development time and  
151 sex ratios. All analyses used the R statistical program (R Development Core Team, 2014).  
152 The level of significance was 5%. All biological parameters evaluated had 50 technical  
153 replicates in all assays.

154

## 155 **RESULTS**

### 156 ***Oviposition preference***

157 Significant differences were recorded between the numbers of eggs on the 10 genotypes, as  
158 compared with CMC-40 (ANOVA  $P < 0.0001$ , followed by Tukey  $P < 0.05$ ) (Table 2). The  
159 oviposition rate ranged from  $1.5 \pm 0.09$  to  $27.1 \pm 1.98$  eggs/8 days for the assessed genotypes  
160 (Table 2). Female mites showed the highest oviposition rates on genotype 60444 ( $27.1 \pm 1.98$   
161 eggs) with average number of eggs approximately twice compared to the susceptible check  
162 CMC-40 ( $14.8 \pm 1.02$  eggs). NAT-31 and ALT-6 displayed low oviposition rates ( $1.5 \pm 0.09$   
163 eggs and  $3.3 \pm 0.16$  eggs, respectively, Table 2). Significant differences were recorded among  
164 genotypes ( $P < 0.05$ ) at 24h and 48h (Table 2). A group of genotypes (PER-182, 60444,  
165 CMC-40) are preferred at 24h while presence of females was substantially delayed on NAT-  
166 31, ALT-6, ECU-72, ECU-160.

167 Ten genotypes with contrasting oviposition rates were selected and tested with choice  
168 and no choice bioassays. The experiment confirmed the second trial, oviposition rates ranged  
169 between  $5.34 \pm 0.99$  and  $23.7 \pm 4.3$  eggs/female/8 days for choice bioassays and  $4.4 \pm 0.28$  and

170 13.34±2.97 eggs/female/8days for no choice bioassays (Tables 2 and 3). Oviposition rates  
171 (number of eggs/genotype) on NAT-31 and ALT-6 had, respectively, 79.2% and 82%  
172 reduction when compared to the oviposition rate of the susceptible check CMC-40 (Table 2).  
173 Significant differences were noted between the numbers of eggs on the four genotypes  
174 compared with those on CMC-40 ( $P < 0.05$ ) (Figure 3). Oviposition ranged from 7.9±0.29-  
175 35.42±1.21 eggs/8 days in the second choice bioassays and 4.67±0.49-14.03±0.97 eggs/8 days  
176 in the no choice bioassay (Tables 2 and 3).

177 In the second bioassay, the oviposition preference for genotypes 60444 (31.11± 1.20  
178 eggs) and ECU-72 (35.42± 1.21 eggs) was similar to CMC-40 (29.12± 1.40 eggs) (Tables 2  
179 and 3), and NAT-31 remained the least preferred (7.90± 0.29 eggs) (Table 2). There were  
180 significant differences in the number of eggs laid on NAT-31 and ALT 6 compared with the  
181 susceptible genotype (CMC-40) (Tables 2 and 3) ( $P < 0.05$ ) used as control. The least  
182 preferred genotypes in the preliminary trial were NAT-31 (2.2±0.012 eggs) and ALT-6  
183 (1.9±0.009 eggs), with 79.2% and 82% reduction in oviposition, respectively (Table 2). In the  
184 second trial, genotypes 60444 (14.03±0.97 eggs) and ECU-72 (9.48±0.73 eggs) had higher  
185 oviposition rates compared with CMC-40 (7.48±0.66 eggs) (Table 2). As in the preliminary  
186 selection, NAT-31 was the green mite least preferred accession (4.67±0.49 eggs). As in the  
187 first trial, at no choice assays, female mites preferred oviposit to at 24h and 48h but there were  
188 significant differences among genotypes ( $P < 0.05$ ) (Table 2).

189

### 190 ***Developmental time and sex ratio***

191 Development time on the selected genotypes were similar with the exception of ECU-160, on  
192 which *M. tanajoa* had a significantly shorter development time as compared to the other  
193 genotypes (Table 4). Despite a relatively homogenous egg-to-adult development time in most  
194 genotypes, there were significant differences between genotypes for development time of  
195 particular stages. The CMC40 genotype in all experiments and evaluated parameters behaves  
196 as a slightly susceptible material when compared to 60444 (Tables 2 and 3; Figures 2 and 3).  
197 For this reason, material 60444 was selected as a susceptible material when dealing with pests  
198 such as the green mite. The CMC40 material can be compared to 60444, PER335 and ALT12.  
199 The genotypes NAT-31, ECU-72 y ALT-12 displayed either reduction or increase in life  
200 parameters of the acari. For instance, the developmental times were reduced when exposed to  
201 NAT-31 being 1.10±0.15 for protonymph and 0.67±0.09 for deutonymph but increased  
202 6.22±0.30 for eggs; ECU-72 reduced 0.0±0.0 the teleiochrysalid stage while increased the  
203 larvae (1.55±0.14) and deutonymph (2.27±0.20). Finally, ALT-12 reduced in the egg stage

204 (3.5±0.18) and increased for teleiochrysalid (1.05±0.06) and adults (3.50±0.19). The egg  
205 stage on the susceptible check CMC-40 was significantly shorter as compared to resistant  
206 genotypes. The short egg stage on CMC-40 was outbalanced by a longer protochrysalide  
207 stage (1.85±0.16 d) when compared, for example, to NAT-31 (0.7±0.07 d). On ECU-72, a  
208 genotype previously reported to be resistant genotype to pests (Bohórquez, 2009), the egg  
209 stage time (3.65±0.13 d) was comparable to the susceptible check CMC-40. The proportion  
210 of females (0.9:0.1) was not affected on two of the genotypes; ALT12 and COL1505 (Table  
211 4).

212

## 213 **DISCUSSION**

214 Overall, our results showed that *M. tanajoa* had higher preference for genotype 60444 than  
215 CMC-40 (Tables 2 and 3, Figures 2 and 3). CMC-40 has been previously identified as the  
216 most susceptible host to arthropod cassava pests (Bellotti, 2002; Burbano, 2007; Bohorquez,  
217 2009). The free-choice bioassay proposed in the present study has been instrumental to  
218 compare genotype preference. CMC-40 appeared to have properties that render this genotype  
219 attractive for female colonization and oviposition. The genotype 60444, a model African  
220 variety used in virology and biotech studies (Bull *et al.*, 2009; Anjanappa *et al.*, 2016),  
221 displayed even higher preference to green mite as compared to CMC-40.

222 In both choice and no choice assays the permanence had a similar trend and shows  
223 contrasting preferences for all accessions. Oviposition preference of free choice assays (Table  
224 2) allows us to rank genotypes in seven groups (from highest to lowest) according their  
225 suitability to host acari eggs. Thus: 60444; PER-335; ALT-12-CMC-40; COL-1505-ECU-72;  
226 PER-182-ECU-160; ALT-6 and NAT31. In contrast, only three groups are identified from no  
227 choice assays: 60444 and ECU-160; PER335-PER182-ALT12-COL1505-ECU72 and ALT6-  
228 NAT31-CMC40. Thus, in the no choice assay experiment, disregard of the genotype, it was  
229 possible to confirm the acari preference to oviposit on a given genotype. Our results indicate  
230 60444 as the most preferred genotype while ALT-6 and NAT31 were the less preferred. These  
231 results allow us to establish that the chosen accessions for this study were actually a  
232 representative sample from the germplasm bank with a high resistance variability affecting  
233 green mite fitness. Further work is required in order to identify the chemical and physical  
234 barriers of the susceptible and resistance genotypes in the response of the green acari attack.  
235 Among the former, pre-formed or constitutive agents could influence the adaptation of the  
236 green mite to this genotype; among the latter, secondary metabolites that influence attraction  
237 or repellence towards the genotype might be involved in susceptibility (Schoonhoven *et al.*,

238 2005; Dicke and Baldwin, 2010; Piesik *et al.*, 2011). All of these represent important issues to  
239 be analysed.

240 Hence, *M. tanajoa* is likely to use diverse strategies for host plant selection than for  
241 oviposition. A main strategy is the recognition of host, depending on the physicochemical  
242 properties of the surface of the leaves. During this process, mites may stay longer in one  
243 genotype than another, without indicating a clear host selection for oviposition. Another  
244 possibility is that the mite chooses a genotype exclusively to feed on but another to lay its  
245 eggs. This, actually, might represent a protection strategy. NAT-31 and ALT-6 were the least  
246 preferred genotypes where the females remain, however the first was more preferred to  
247 oviposit than the second (Tables 2, 3).

248 Developmental times in our study were similar to those observed by Yaseen and  
249 Bennet (1977) and Yaninek *et al.* (1984). In those studies, the developmental time of *M.*  
250 *tanjaja* was inversely proportional to temperature. Additionally, significant differences were  
251 present among the cassava genotypes at different stages of development (Table 4). Our study  
252 demonstrates a long development time in green mite (11.07-15.10 days) in all the genotypes,  
253 being only variable in ECU-160 (Table 4), which was the only genotype showing a significant  
254 difference compared to the other genotypes. Despite that no statistically significant difference  
255 was detected in the total developmental time of the green acari on the tested genotypes,  
256 differences were found when acari stages were analysed suggesting that each genotype exerts  
257 an antibiotic mechanism on the immature stages. An analysis of this variability shows that  
258 NAT-31, ECU-72 and ALT-12 genotypes appear to influence, either decreasing or increasing,  
259 developmental times of three different acari stages when compared to the rest of genotypes  
260 (ALT16, PER182, PER335, COL1505 and CMC40). In these cases, only a development stage  
261 was the influent, while in ECU160 two stages did. Arias (1995) and Gómez (2004) already  
262 reported a high mortality of nymphs when they fed on the ECU-72 material, concluding that  
263 the mortality of nymphal instars along with the length of the acari's life cycle are a clear  
264 mechanism of antibiosis. In our study, it was observed that ECU-72 increases the time in  
265 stages of development such as larvae and deutonymph, while NAT-31 increases the egg stage,  
266 which might indicative of the influence of these genotypes by antibiosis at the time of  
267 development of the green mite. Table 2 shows the tendencies of genotypes NAT-31 and ALT-  
268 6 towards low oviposition as compared to the genotype 60444 which experiences higher  
269 levels of infestation. Our results are in agreement with previous observations of the green mite  
270 on CMC-40 system developed by Mesa *et al.* (1987) being mite behavior on CMC-40 similar  
271 to the parameters of oviposition and developmental time. As in the preliminary trial at both,



272 choice and no choice assays, NAT-31 was identified as the less preferred, while 60444 was  
273 the most preferred in terms of green mite oviposition. NAT-31 is the less preferred probably  
274 because the disruption of oviposition prevents continuity of the mite progeny (see also  
275 Bohórquez, 2009; Carabali *et al.*, 2009). Bohórquez (2009) suggests that NAT-31 shows  
276 antibiotic and antixenotic characteristics against *A. socialis*. However, Vargas *et al.* (2002)  
277 were the first to report the benefits of NAT-31, a variant of cassava (*M. esculenta*) resistant to  
278 whitefly (*A. socialis*) at the Valle Cálido of the Alto Magdalena. It is possible that resistance  
279 is due to the lineage as the parents of that genotype are ECU-72 and BRA-12. ECU-72 has  
280 previously been shown to be resistant to whitefly (Bohórquez, 2009) and recently reported to  
281 have high levels of green mite resistance. Likely, resistance established in the NAT-31  
282 genotype comes from one of its parents (ECU-72) whose genes confer resistance to whitefly.  
283 Although the heritability of the resistance is unknown, most likely it is governed by several  
284 genes (polygenic). Hence, one can speculate that the other parent (BRA-12) presents some  
285 level of resistance to arthropods conferring an additive effect to NAT-31. However, there is a  
286 need to evaluate the possible resistance of BRA-12 to attack of the green mite. Genotypes  
287 ECU-72, ECU-160, PER-182 and PER-335 showed similar trends for mite oviposition  
288 preference and oviposition rate. These results mirror previous studies, which suggest that  
289 these genotypes are key elements in developing resistance to whiteflies (Burbano *et al.* 2007;  
290 Bohórquez, 2009; Carabalí *et al.*, 2010a; 2010b; 2013), of these, NAT-31, ECU-72, 60444  
291 genotypes were previously prioritized for in-depth screening (Burbano *et al.*, 2007; Carabalí  
292 *et al.* 2010a, b). A particular response exists depending on the type of pest; in the case of  
293 green mites, one can hypothesise the capacity of adaptation and the ample host range the pests  
294 could prompt their coevolution with cassava. All of this might push the mite to behave in a  
295 polyphagous manner. Nevertheless more studies are needed on the host adaptability to  
296 *Manihot* relatives to evaluate and confirm the possible polyphagous mite behavior.

297 In all the cassava genotypes, *M. tanajoa* females began to oviposit within the first 24  
298 h. Nearly 90-100% of the eggs had been oviposited onto the selected genotypes by the fourth  
299 day, (Figures 2 and 3). Since this oviposition rate illustrates the preference of the green mite  
300 towards different cassava genotypes, it is plausible to consider that cassava accessions show  
301 similar patterns of infestation and defensive responses in the first 24 h. Nevertheless, the high  
302 rates of oviposition recorded among the other genotypes were 35% lower than that observed  
303 in 60444. *M. tanajoa* females were observed to have high values oviposition preference and  
304 oviposition rates on the latter accession (Tables 2, 3 and 4).

305 In our study, NAT-31 displayed short development times for proto- and deutonymph,

306 key stages in the mite's life cycle. ECU-72 and ECU-160 tended to suppress the quiescent  
307 stages; hence, variants NAT-31, ECU-72 and ECU-160, suppressing and displaying  
308 development times, could possess an antibiosis mechanism that might partially explain  
309 various levels of resistance. In all genotypes, except ALT12 and COL1505, the proportion of  
310 females (0.9:0.1) was not affected (Table 4), within the established observations on male  
311 presented a constant motion seeking female's quiescence states to fertilize. Another feature of  
312 the male is to feed very little when compared with females. It is important to note that the  
313 females decide which eggs will be male, due in large part to their haplo-diploid condition  
314 (Yaninek *et al.*, 1988). Overall, results of the biology and preference for oviposition  
315 demonstrate that genotype NAT-31 exhibits resistance to *M. tanajoa*. Further, the different  
316 levels of resistance observed in the evaluated genotypes also suggest, variable levels of  
317 antixenosis and antibiosis. These findings are due mainly to the development time, suggesting  
318 that factor as responsible for the differences established between CMC-40 and the other  
319 genotypes. According to Sabelis (1985) changes in development time is the most crucial  
320 factor for the growth of mite populations.

321 In conclusion, oviposition preference, development time and sex ratio of the green  
322 mite were parameters allowing the identification of different levels of resistance (antixenotic  
323 and antibiosis) in the cassava germplasm.

324 Firstly, 60444 was the accession with levels of susceptibility higher than CMC-40  
325 previously used in pest-cassava studies as susceptible check. Hence is plausible to conclude,  
326 in general, that 60444 can be considered as the most susceptible genotype indicating better  
327 adaptation of the mite to this host. The mite possesses a number of characteristics to assist in  
328 this behaviour, such as its high mutation rate and its aggregated distribution in the fields via  
329 colonies, which greatly reduces genetic crosstalk among organisms and makes resistance  
330 dilution difficult (Mesa *et al.*, 1987; Saito *et al.*, 1983). This response needs to be examined at  
331 the gene and molecular levels to explain the plant's behaviour. Secondly, NAT-31 showed  
332 low population levels of *M. tanajoa*, which might indicate resistance to the green mite. This  
333 result could be exploited in genetic improvement programs for assisted selection of resistance  
334 to one of the most significant pests in the Americas and Africa (CIAT, 2006). Identification  
335 and characterization of accessions highly resistant to green mites will be particularly  
336 instrumental to investigate the molecular determinants of the resistance against green mite in  
337 cassava. Recent large-scale omics studies in cassava have helped to identify proteins  
338 associated with improved traits in cassava (Owiti *et al.*, 2011; Vanderschuren *et al.*, 2014).  
339 Similar studies with accessions contrasting for resistance against green mite (*i.e.* 60444,

340 CMC-40, ECU-72 and NAT-31) could lead to the identification of genes, transcripts and  
341 protein expression patterns associated with pest resistance.

342

### 343 **Acknowledgments**

344 Authors thank to Dr. Herve Vanderschuren for his valuable comments and help in editing  
345 versions of the manuscript. Also to Adriana Alzate, Adriano Muñoz and Mario Salazar for  
346 their technical support. The funds provided by Colciencias and Univalle throughout grants  
347 1106-521-28281: ‘Molecular characterization of resistance in cassava (*Manihot esculenta*  
348 Crantz) to attack the green mite (*Mononychellus tanajoa*): a proteomics approach’ and the  
349 PhD grant awarded by Colciencias to the student Jaime Marín 4942009. To the editor, who  
350 did important recommendations that improved the original version of the manuscript.

351

352

353

### 354 **REFERENCES**

- 355 Anjanappa RB, Metha D, Maruthi M N, Kanju E, Gruissem W, Vanderschuren H (2016)  
356 Characterization of brown streak virus-resistant cassava. *Mol Plant Microbe Interact*  
357 29 (7): 527-534 doi: 10.1094/MPMI-01-16-0027-R
- 358 Anggraini V, Sudarmonowati E, Hartati NS, Suurs L, Visser RGF (2009) Characterization of  
359 cassava starch attributes of a different genotypes. *Starch-Starke* 61(8): 472-481  
360 [doi.org/10.1002/star.200800121](https://doi.org/10.1002/star.200800121)
- 361 Arias B (1995) Estudio sobre el comportamiento de la “mosca blanca” *Aleurotrachelus*  
362 *socialis* Bondar (Homoptera: Aleyrodidae) en diferentes clones de yuca *Manihot*  
363 *esculenta* Crantz. MSc. Thesis. Universidad Nacional de Colombia, Facultad de  
364 Agronomía. Palmira-Colombia.
- 365 Balagopalan C (2002) Cassava utilization in food, feed and industry. *In*: Hillocks, J., Thresh,  
366 J., Bellotti, A. (Eds.), *Cassava: biology, production and utilization*. CABI Publishing,  
367 Oxon, UK, pp. 301–318
- 368 Bellotti AC, Herrera CL, Hernandez MP, Arias B, Guerrero JM, Melo EL (2012) Cassava  
369 pests in Latin America, Africa and Asia. In R.H. Howeler, ed. *The Cassava Handbook*  
370 –A reference manual based on the Asian regional cassava-training course, hold in  
371 Thailand. Cali, Colombia, CIAT. pp. 199-257
- 372 Bellotti AC, Herrera CL, Hernandez MP, Arias B, Guerrero JM, Melo EL (2010) Three major

- 373 cassava pests in Latin America, Africa and Asia. In R.H. Howeler, ed. A new future  
374 for cassava in Asia: Its use as food, feed and fuel to benefit the poor. Proc. 8th regional  
375 workshop, held in Vientiane, Lao PDR. Oct. 20-24, 2008. pp. 544-577  
376
- 377 Bellotti A (2002) Arthropod pests. In: Hillocks, J.M., Thresh, J.M., Bellotti, A.C. (Eds.),  
378 *Cassava: biology, production and utilization*. CABI Publishing, Oxon, U K. pp. 209–  
379 235
- 380 Bellotti AC, Arias B (2001) Host plant resistance to whiteflies with emphasis on cassava as a  
381 case study. *Crop Prot* 20: 813-823 doi: [10.1016/S0261-2194\(01\)00113-2](https://doi.org/10.1016/S0261-2194(01)00113-2)
- 382 Bellotti A Riis L (1994) Cassava cyanogenic potential and resistance to pests and diseases.  
383 *Acta Hort* 375: 141-145
- 384 Boaventura V, Noronha A, Alves A (2006). Oviposição e desenvolvimento do ácaro verde  
385 (*Mononychellus tanajoa*) em diferentes espécies de *Manihot*. Generation challenge  
386 program (GCP). 32p
- 387 Bohórquez A (2009) Aislamiento de secuencias expresadas diferencialmente durante la  
388 respuesta de defensa al ataque de la mosca blanca (*Aleurotrachelus socialis*) en el  
389 cultivo de yuca (*Manihot esculenta* Crantz) mediante genómica funcional. PhD Thesis.  
390 Universidad Nacional de Colombia. Palmira-Colombia.
- 391 Bull SE, Owiti JA, Niklaus M, Beeching J R, Gruissem W, Vanderschuren H (2009)  
392 *Agrobacterium*-mediated transformation of friable embryogenic calli and regeneration  
393 of transgenic cassava. *Nature Protocols* 4 (12): 1845-1854 doi:  
394 [10.1038/nprot.2009.208](https://doi.org/10.1038/nprot.2009.208).
- 395 Burbano M, Carabalí A, Montoya-Lerma J, Bellotti A (2007) Resistencia natural de especies  
396 silvestres de *Manihot* (Euphorbiaceae) a *Mononychellus tanajoa* (Acariformes),  
397 *Aleurotrachelus socialis* y *Phenacoccus herreni* (Hemiptera). *Rev Col Entomol* 33 (2):  
398 110–115
- 399 Carabali A, Montoya-Lerma J, Bellotti A, Fregene M, Gallego G (2013) Resistance to the  
400 whitefly *Aleurotrachelus socialis* (Hemiptera: Aleyrodidae) and SSR marker  
401 identification in advanced populations of the hybrid *Manihot esculenta* subsp. *Manihot*  
402 *fl abellifolia*. *J Integr Agr* 12(12): 2217-2228 doi.org/10.1016/s2095-3119(13)60661-9
- 403 Carabalí A, Bellotti AC, Montoya-Lerma J, Fregene M (2010a) *Manihot flabellifolia* Pohl,  
404 wild source of resistance to the whitefly *Aleurotrachelus socialis* Bondar (Hemiptera:

- 405           Aleyrodidae). Crop Prot 29: 34-38 doi.org/10.1016/j.cropro.2009.08.014
- 406 Carabalí A, Bellotti AC, Montoya-Lerma J, Fregene M (2010b) Resistance to the whitefly,  
407           *Aleurotrachelus socialis*, in wild populations of cassava, *Manihot tristis*. J Insect Sci  
408           10:170 doi.org/10.1673/031.010.14130
- 409 CIAT (2004) Annual report: Integrated pest and disease management in major  
410           agoecosystems. CIAT, Cali, Colombia. 12-95 p
- 411 CIAT (2006) Manejo integrado de moscas blancas asociadas al cultivo de la yuca. Project:  
412           Manejo integrado sostenible de moscas blancas como plagas y vectores de virus en los  
413           trópicos. Centro Internacional de Agricultura Tropical, Cali, Colombia
- 414 Dicke M, Baldwin IT (2010) The evolutionary context for herbivore induced plant volatiles:  
415           beyond the 'cry for help'. Trends Plant Sci 15: (3) 167-175 doi:  
416           10.1016/j.tplants.2009.12.002
- 417 FAO (2012) Food outlook. Global market analysis – November 2012. Rome
- 418 FAO (2009) FAOSTAT Statistical databases. Rome, Italy: FAO/IFAD. 2000. The world  
419           cassava economy. Facts, trends and Outlook. Food and Agriculture Organization of  
420           the United Nations. International Fund for Agricultural Development, Rome
- 421 Gómez MJ (2004) Caracterización de la resistencia a la mosca blanca *Aleurotrachelus*  
422           *socialis* Bondar (Homoptera: Aleyrodidae) en genotipos de yuca (*Manihot esculenta*  
423           Crantz). Final undergraduate report. Universidad Nacional de Colombia, Palmira. 103  
424           p
- 425 Herrera Campo BV, Myman G, Bellotti AC (2011) Threats to cassava production: known and  
426           potential geographic distribution of four key biotic constraints Food Security (3): 329-  
427           345 <https://hdl.handle.net/10568/35864>
- 428 Lebot V (2009) Tropical root and tuber crops: Cassava, sweet potato, yams and aroids. CABI,  
429           Wallingford, UK
- 430 Legg JP, Owor B, Sseruwagi P, Ndunguru J (2006) Cassava mosaic virus disease in East and  
431           Central Africa: epidemiology and management of a regional pandemic. Adv Virus  
432           Res 67: 355-418 doi [10.1016/S0065-3527\(06\)67010-3](https://doi.org/10.1016/S0065-3527(06)67010-3)
- 433 Mesa N, Bellotti A, Duque M (1987) Tablas de vida de *Mononychellus progresivus* Doreste y  
434           *Tetranychus urticae* (Koch) (Acarina: Tetranychidae) en yuca. Rev Col Entomol 13  
435           (2): 11-22

- 436 Olsen KM, Schaal BA (1999) Evidence on the origin of cassava: Phylogeography of *Manihot*  
437 *esculenta*. Proc Nat Acad Sci USA 96(10): 5586-5591 doi: [10.1073/pnas.96.10.5586](https://doi.org/10.1073/pnas.96.10.5586)
- 438 Omongo CA, Kawuki R, Bellotti AC, Alicai T, Baguma Y, Maruthi MN, Bua A, Colvin J  
439 (2012) African cassava whitefly, *Bemisia tabaci*, resistance in African and South  
440 American cassava genotypes. J Integr Agri 11 (2): 327-336 doi: [10.1016/S2095-  
441 3119\(12\)60017-3](https://doi.org/10.1016/S2095-3119(12)60017-3)
- 442 Owiti JA, Grossmann J, Gehrig P, Laloi C, Dessimoz C, Benn Hansen M, Gruissem W,  
443 Vanderschuren H (2011) iTRAQ-based analysis of changes in the cassava root  
444 proteome reveals new pathways associated with post-harvest physiological  
445 deterioration. Plant J 67 (1): 145-156 doi: [10.1111/j.1365-3113X.2011.04582.x](https://doi.org/10.1111/j.1365-3113X.2011.04582.x).
- 446 Panda N, Khush G (1995) *Host plant resistance to insects*. International Rice Research  
447 Institute, Philippines. Pp 431
- 448 Parsa S, Medina C, Rodríguez V (2015) Sources of pest resistance in cassava. Crop Prot 68:  
449 79-84 doi: [10.1016/j.cropro.2014.11.007](https://doi.org/10.1016/j.cropro.2014.11.007)
- 450 Piesik D, Pańka D, Delaney KJ, Skoczek A, Lamparski R, Weaver DK (2011) Cereal crop  
451 volatile organic compound induction after mechanical injury, beetle herbivory  
452 (*Oulema* spp.), or fungal infection (*Fusarium* spp.). J Plant Physiol 168, 878–886 doi:  
453 [10.1016/j.jplph.2010.11.010](https://doi.org/10.1016/j.jplph.2010.11.010)
- 454 R Core Team (2014) R: A language and environment for statistical computing. R Foundation  
455 for Statistical Computing, Vienna, Austria. URL <http://www.R-project.org/>.
- 456 Rudi N, Norton GW, Alwang J, Asumugha G (2010) Economic impact analysis of marker-  
457 assisted breeding for resistance to pests and postharvest deterioration in cassava. Afr J  
458 Agric Resour Econ 4: 110–122
- 459 Sabelis MW (1985) Reproductive strategies. In: Helle W, Sabelis MW (eds) Spider mites.  
460 Their biology, natural enemies and control, vol 1A. Elsevier, Amsterdam, pp 265–278
- 461 Saito T, Tabata K, Kohno S (1983) Mechanisms of acaricide resistance with emphasis on  
462 dicofol. In: Pest resistance to pesticides, ed. G.P. Geor-Ghiou & T. Saito. Plenum  
463 Publ. Corporation, U.S.A. pp. 429-444
- 464 Schoonhoven LM, Van Loon JJA, Dicke M (2005) Insect–plant biology. Oxford: Oxford  
465 University Press

466 Vanderschuren H, Nyaboga E, Poon JS, Baerenfaller K, Grossmann J, Hirsch-Hoffmann M,  
467 Kirchgessner N, Nanni P, Gruissem W (2014) Large-scale proteomics of cassava  
468 storage root and identification of a target gene to reduce post-harvest losses. *Plant Cell*  
469 26(5): 1913-1924 doi.org/10.1105/tpc.114.123927

470 Vargas H, Rey B, Arias V, Bellotti A (2002) Nataima-31: Variedad de yuca (*Manihot*  
471 *esculenta* Crantz) resistente a mosca blanca (*Aleurotrachelus socialis* Bondar) para el  
472 valle cálido del alto Magdalena. Centro Internacional de Agricultura Tropical (CIAT),  
473 Cali, CO; Corporación Colombiana de Investigación Agraria (CORPOICA), Bogotá,  
474 Colombia; Ministerio de Agricultura y Desarrollo Rural, Bogotá

475 Yaninek JS, Herren HR (1988) Introduction and spread of the cassava green mite,  
476 *Mononychellus tanajoa* (Bondar) (Acari: Tetranychidae), an exotic pest in Africa, and  
477 the search for appropriate control methods; a review. *Bull Entomol Res* 78: 1-13  
478 doi.org/10.1017/S0007485300016023

479 Yaninek, JS (1988) Continental dispersal of the cassava green mite, an exotic pest in Africa,  
480 and implications for biological control. *Experimental Applied Acarology* 4: 211-224  
481 [doi.org/10.1007/BF01196187](https://doi.org/10.1007/BF01196187)

482 Yassen M, Bennet FD (1977) Distribution, biology and population dynamics of the green  
483 cassava mite in the neotropics. Pp. 197-902. In *Proceedings of the Forth Symposium*  
484 *of the International Society for Tropical Root Crops, 1976*. Ed. J. Cock, R. Mac Intyre  
485 and M. Graham. International Development Research Centre, Ottawa

486

487

## 488 **Figure captions**

489 **Figure 1.** Design of the (A) choice and (B) no-choice assays for oviposition preference of  
490 cassava green mite on leaf lobes of various cassava genotypes. Initially mite responses were  
491 screened on leaves of 10 genotypes (left) and subsequently responses were assessed on five  
492 genotypes (right) after 1, 2 and 8 days.

493

494 **Figure 2.** Test to free (A) and not free (B) preference for oviposition in 10 cassava  
495 genotypes, first selection. Evaluating in days the preference of the green mite to lay eggs.

496

497 **Figure 3.** Test to free (A) and not free (B) preference for oviposition in 5 cassava genotypes,

498 second selection. Evaluating in days the preference of the green mite to lay eggs.



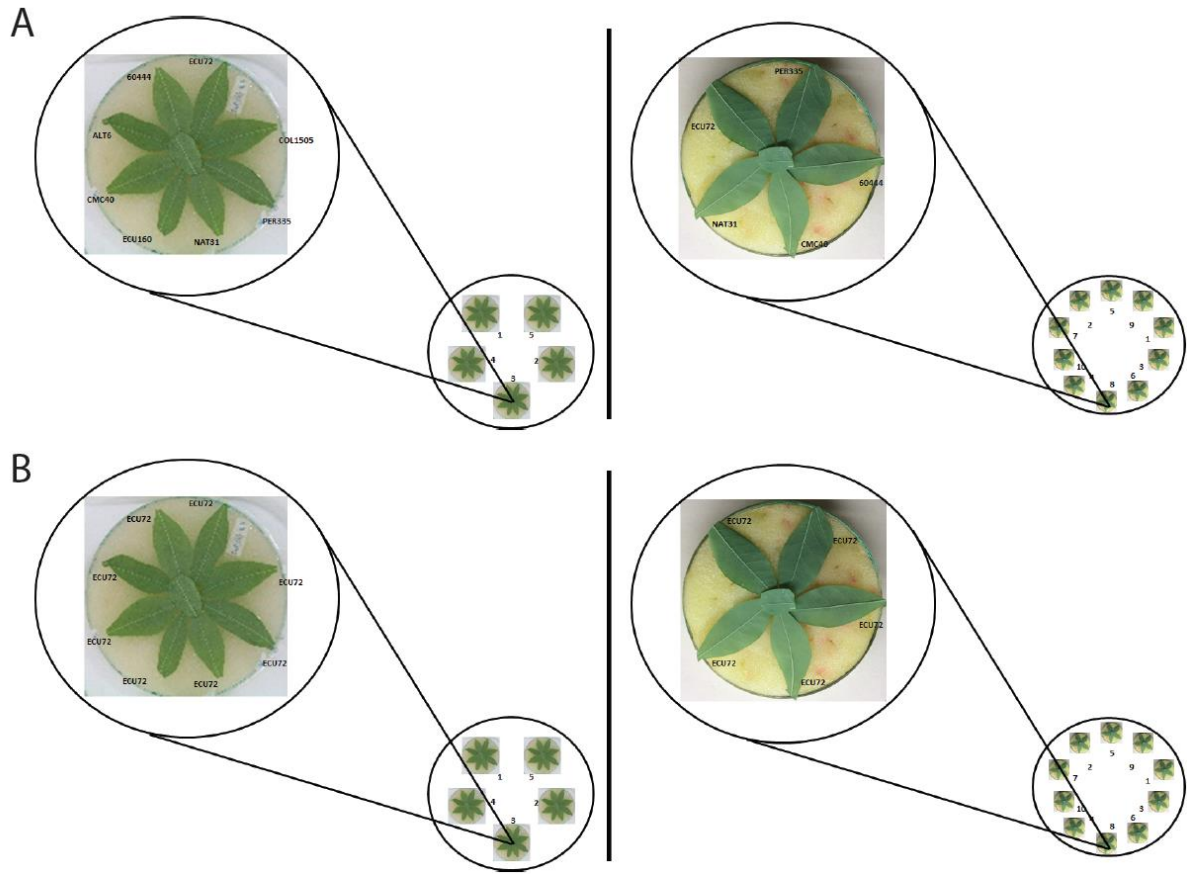

499

500 **Figure 1**

501

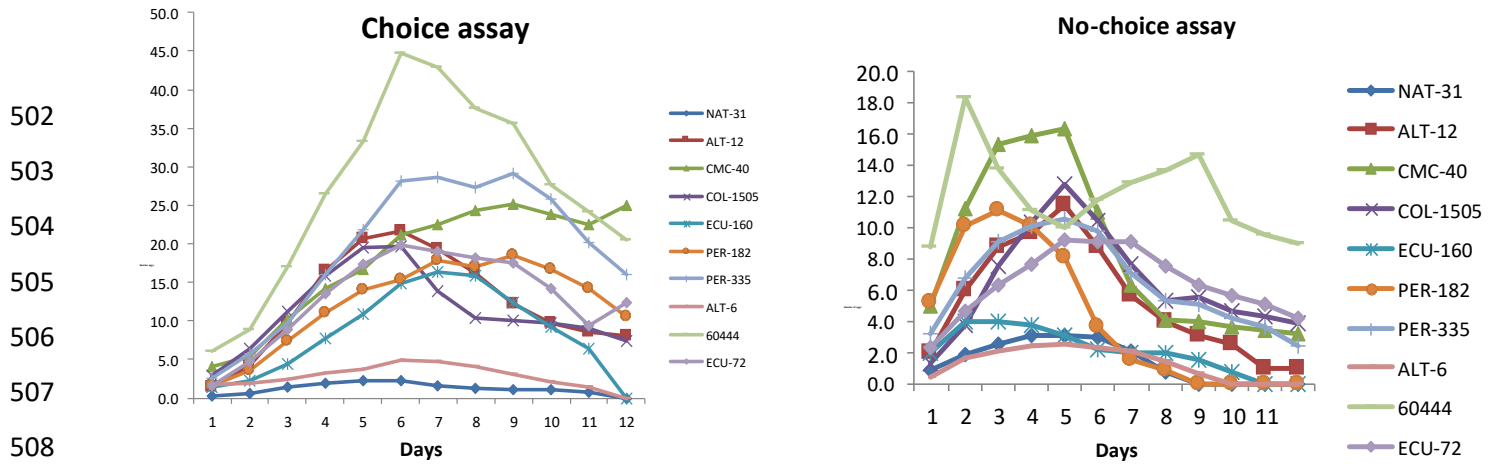

Figure 2

509  
510  
511

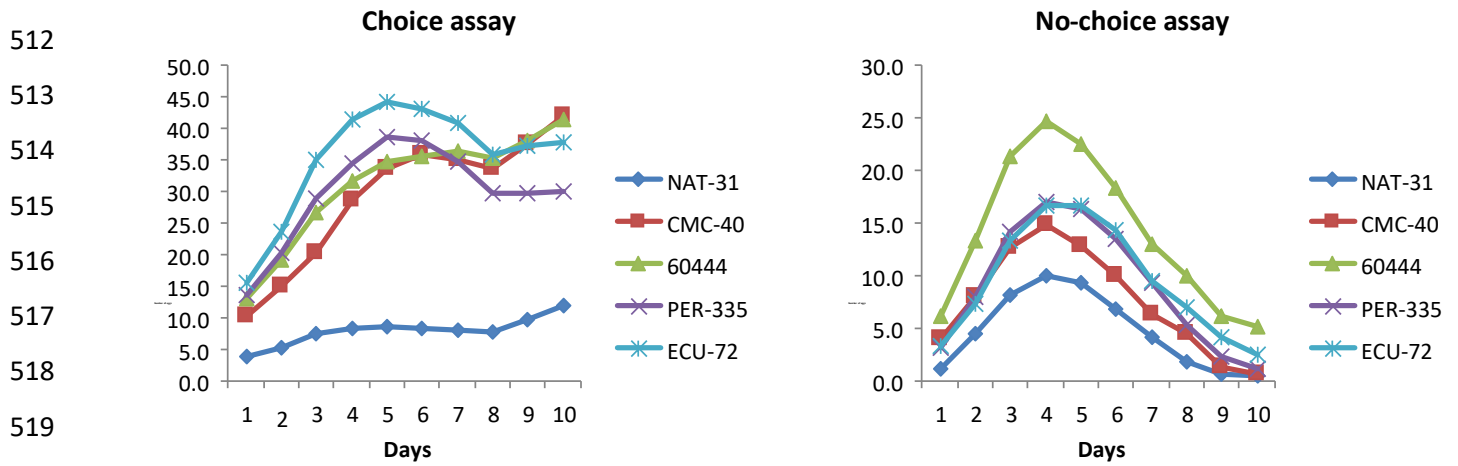

Figure 3

522

523 **Table 1** Recorded cassava genotypes with variable levels of resistance or tolerance to arthropod pests.

| Accession          | Mites                        | Whiteflies                                              | Other pests          | Resistance/tolerance | References                                                                                                                                     |
|--------------------|------------------------------|---------------------------------------------------------|----------------------|----------------------|------------------------------------------------------------------------------------------------------------------------------------------------|
| ALT-6              | <i>Mononychellus tanajoa</i> |                                                         |                      | Tolerance            | CIAT, 2004                                                                                                                                     |
| ALT-12             | <i>M. tanajoa</i>            |                                                         |                      | Tolerance            | CIAT, 2004                                                                                                                                     |
| COL-1505           | -                            | -                                                       | -                    | -                    | -                                                                                                                                              |
| ECU-72             |                              | <i>Aleurotrachelus socialis</i> , <i>Bemisia tabaci</i> |                      | Resistance           | Bellotti and Arias, 2001; Gómez, 2004; Carabalí <i>et al.</i> , 2009; Bohorquez, 2009; Omongo <i>et al.</i> , 2012; Parsa <i>et al.</i> , 2015 |
| ECU-160            | <i>M. tanajoa</i>            |                                                         |                      | Tolerance            | Burbano <i>et al.</i> , 2007                                                                                                                   |
| NAT-31 (CG 489-31) |                              | <i>A. socialis</i>                                      |                      | Resistance           | Vargas <i>et al.</i> , 2002                                                                                                                    |
| PER-182            | <i>M. tanajoa</i>            |                                                         |                      | Tolerance            | Boaventura <i>et al.</i> , 2006                                                                                                                |
| PER-335            | <i>M. tanajoa</i>            | <i>A. socialis</i>                                      |                      | Tolerance            | Bellotti and Arias, 1981; Boaventura <i>et al.</i> , 2006                                                                                      |
| 60444              |                              |                                                         | <i>Erinnyis ello</i> | Tolerance            | Herrera <i>et al.</i> , 2011; CIAT, 2004                                                                                                       |

524

525 **Table 2** Choice assay for oviposition preference of *Mononychellus tanajoa*: mean ( $\pm$  SE) number of eggs laid after 24 and 48 h and preference for oviposition  
 526 measured by no. eggs/genotype and average oviposition rate (N=500).

| Accession | First trial                   |                               |                                |                                                      | Second trial                  |                                                      |
|-----------|-------------------------------|-------------------------------|--------------------------------|------------------------------------------------------|-------------------------------|------------------------------------------------------|
|           | No. eggs after 24 h           | No. eggs after 48 h           | No. eggs after 8 days          | Oviposition rate (no. eggs/ Per day and per females) | No. eggs after 8 days         | Oviposition rate (no. eggs/ Per day and per females) |
| 60444     | 6.14 $\pm$ 7.93 <sup>a</sup>  | 8.88 $\pm$ 11.93 <sup>a</sup> | 27.1 $\pm$ 1.98 <sup>a</sup>   | 9.9 $\pm$ 0.27 <sup>a</sup>                          | 31.11 $\pm$ 1.20 <sup>a</sup> | 19.12 $\pm$ 3.25 <sup>a</sup>                        |
| PER-335   | 2.66 $\pm$ 4.32 <sup>bc</sup> | 5.7 $\pm$ 9.0 <sup>b</sup>    | 17.5 $\pm$ 1.39 <sup>ab</sup>  | 12.6 $\pm$ 0.3 <sup>ab</sup>                         | 29.72 $\pm$ 1.04 <sup>a</sup> | 20.16 $\pm$ 3.67 <sup>a</sup>                        |
| PER-182   | 1.6 $\pm$ 3.2 <sup>cd</sup>   | 3.54 $\pm$ 6.62 <sup>bc</sup> | 11.0 $\pm$ 0.81 <sup>bcd</sup> | 2.9 $\pm$ 0.19 <sup>bcd</sup>                        | -                             | -                                                    |
| ALT-12    | 1.44 $\pm$ 2.43 <sup>cd</sup> | 4.16 $\pm$ 5.57 <sup>bc</sup> | 13.7 $\pm$ 1.01 <sup>b</sup>   | 2.74 $\pm$ 0.27 <sup>b</sup>                         | -                             | -                                                    |
| ALT-6     | 1.8 $\pm$ 3.07 <sup>cd</sup>  | 1.86 $\pm$ 3.05 <sup>cd</sup> | 3.3 $\pm$ 0.16 <sup>cd</sup>   | 0.8 $\pm$ 0.005 <sup>cd</sup>                        | -                             | -                                                    |
| COL1505   | 2.84 $\pm$ 5.6 <sup>bc</sup>  | 6.32 $\pm$ 9.86 <sup>ab</sup> | 12.4 $\pm$ 0.79 <sup>bc</sup>  | 2.8 $\pm$ 0.34 <sup>bc</sup>                         | -                             | -                                                    |
| ECU-160   | 1.46 $\pm$ 4.15 <sup>cd</sup> | 2.32 $\pm$ 4.6 <sup>cd</sup>  | 9.2 $\pm$ 0.81 <sup>bcd</sup>  | 2.3 $\pm$ 0.08 <sup>bcd</sup>                        | -                             | -                                                    |
| NAT-31    | 0.28 $\pm$ 0.9 <sup>d</sup>   | 0.62 $\pm$ 1.74 <sup>d</sup>  | 1.5 $\pm$ 0.09 <sup>d</sup>    | 0.42 $\pm$ 0.03 <sup>d</sup>                         | 7.90 $\pm$ 0.29 <sup>b</sup>  | 5.34 $\pm$ 0.99 <sup>b</sup>                         |
| ECU-72    | 1.54 $\pm$ 2.89 <sup>cd</sup> | 4.7 $\pm$ 7.97 <sup>bc</sup>  | 12.9 $\pm$ 0.93 <sup>bc</sup>  | 3.2 $\pm$ 0.31 <sup>bc</sup>                         | 35.42 $\pm$ 1.21 <sup>a</sup> | 23.70 $\pm$ 4.3 <sup>a</sup>                         |
| CMC-40    | 4.0 $\pm$ 5.8 <sup>b</sup>    | 5.46 $\pm$ 6.1 <sup>b</sup>   | 14.8 $\pm$ 1.02 <sup>b</sup>   | 3.7 $\pm$ 0.14 <sup>b</sup>                          | 29.12 $\pm$ 1.40 <sup>a</sup> | 14.92 $\pm$ 2.26 <sup>a</sup>                        |
| F         | 6.948                         | 4.6985                        | 10.851                         |                                                      | 7.7825                        |                                                      |
| d.f.      | 9 - 490                       | 9 - 490                       | 9 - 490                        |                                                      | 4 - 245                       |                                                      |
| P         | <1.855e <sup>-09</sup> ***    | <5.331e <sup>-06</sup> ***    | 1.889e <sup>-15</sup> ***      |                                                      | 6.412e <sup>-06</sup> ***     |                                                      |

527 Means within a column followed by the same letter are not significantly different (Tukey's HSD test: P>0.05).

528

529 **Table 3** No-choice assays for oviposition preference of *Mononychellus tanajoa*: mean ( $\pm$  SE) number of eggs laid after 24 and 48 h and preference for  
 530 oviposition measured by No. eggs/genotype and average oviposition rate of *M. tanajoa* a no-free choice (N=500).

| Accession | First trial                   |                                |                              |                                                           | Second trial                  |                                                            |
|-----------|-------------------------------|--------------------------------|------------------------------|-----------------------------------------------------------|-------------------------------|------------------------------------------------------------|
|           | No. eggs after 24 h           | No. eggs after 48 h            | No. eggs after 8 days        | Oviposition rate<br>(no. eggs/Per day<br>and per females) | No. eggs after 8 days         | Oviposition rate (no.<br>eggs/ Per day and per<br>females) |
| 60444     | 8.73 $\pm$ 13.7 <sup>a</sup>  | 18.3 $\pm$ 34.73 <sup>a</sup>  | 12.5 $\pm$ 0.38 <sup>e</sup> | 4.5 $\pm$ 0.96 <sup>e</sup>                               | 14.03 $\pm$ 0.97 <sup>a</sup> | 13.34 $\pm$ 2.97 <sup>a</sup>                              |
| PER335    | 3.2 $\pm$ 3.53 <sup>bcd</sup> | 6.8 $\pm$ 6.86 <sup>bcd</sup>  | 7.7 $\pm$ 0.34 <sup>ef</sup> | 2.2 $\pm$ 0.3 <sup>ef</sup>                               | 9.02 $\pm$ 0.80 <sup>ab</sup> | 7.96 $\pm$ 1.83 <sup>ab</sup>                              |
| PER-182   | 5.2 $\pm$ 6.87 <sup>b</sup>   | 10.1 $\pm$ 17.53 <sup>bc</sup> | 6.3 $\pm$ 0.53 <sup>ef</sup> | 1.7 $\pm$ 0.49 <sup>ef</sup>                              | -                             | -                                                          |
| ALT-12    | 1.96 $\pm$ 3.03 <sup>cd</sup> | 6.0 $\pm$ 7.37 <sup>bcd</sup>  | 7.0 $\pm$ 0.41 <sup>ef</sup> | 1.4 $\pm$ 0.4 <sup>ef</sup>                               | -                             | -                                                          |
| ALT-6     | 0.43 $\pm$ 1.22 <sup>d</sup>  | 1.63 $\pm$ 2.41 <sup>d</sup>   | 1.9 $\pm$ 0.009 <sup>f</sup> | 0.5 $\pm$ 0.11 <sup>f</sup>                               | -                             | -                                                          |
| COL1505   | 1.33 $\pm$ 2.41 <sup>d</sup>  | 3.73 $\pm$ 4.32 <sup>cd</sup>  | 7.4 $\pm$ 0.5 <sup>ef</sup>  | 1.6 $\pm$ 0.24 <sup>ef</sup>                              | -                             | -                                                          |
| ECU-160   | 2.0 $\pm$ 3.73 <sup>cd</sup>  | 3.96 $\pm$ 4.95 <sup>cd</sup>  | 4.0 $\pm$ 0.0 <sup>e</sup>   | 1.0 $\pm$ 0.19 <sup>f</sup>                               | -                             | -                                                          |
| NAT-31    | 0.9 $\pm$ 1.9 <sup>d</sup>    | 1.83 $\pm$ 2.37 <sup>d</sup>   | 2.2 $\pm$ 0.12 <sup>f</sup>  | 0.62 $\pm$ 0.09 <sup>f</sup>                              | 4.67 $\pm$ 0.49 <sup>b</sup>  | 4.4 $\pm$ 0.28 <sup>b</sup>                                |
| ECU-72    | 2.3 $\pm$ 2.84 <sup>bcd</sup> | 4.66 $\pm$ 5.94 <sup>bcd</sup> | 7.0 $\pm$ 0.32 <sup>ef</sup> | 1.8 $\pm$ 0.24 <sup>ef</sup>                              | 9.48 $\pm$ 0.73 <sup>ab</sup> | 7.3 $\pm$ 1.41 <sup>ab</sup>                               |
| CMC-40    | 4.96 $\pm$ 7.93 <sup>bc</sup> | 11.2 $\pm$ 12.83 <sup>b</sup>  | 2.2 $\pm$ 0.12 <sup>f</sup>  | 0.5 $\pm$ 0.009 <sup>f</sup>                              | 7.48 $\pm$ 0.66 <sup>ab</sup> | 7.98 $\pm$ 1.69 <sup>ab</sup>                              |
| F         | 6.5079                        | 4.8212                         | 4.3402                       |                                                           | 3.3728                        |                                                            |
| d.f.      | 9 - 290                       | 9 - 290                        | 9 - 290                      |                                                           | 5 - 294                       |                                                            |
| P         | 1.904e <sup>-08 ***</sup>     | 5.179e <sup>-06 ***</sup>      | 2.545e <sup>-05 ***</sup>    |                                                           | 0.005596 **                   |                                                            |

531 Means within a column followed by the same letter are not significantly different (Tukey's HSD test: P>0.05).

532

533 **Table 4.** Time development per stages and proportion of *Mononychellus tanajoa* on selected cassava genotypes (n=50).

| Accession | Egg                     | Larvae                   | Protochrysalid           | Protonymph              | Deutochrysalid           | Deutonymph               | Teleiochrysalid          | Adult                   | Egg-adult development time | Proportion of females |
|-----------|-------------------------|--------------------------|--------------------------|-------------------------|--------------------------|--------------------------|--------------------------|-------------------------|----------------------------|-----------------------|
| NAT-31    | 6.22±0.30 <sup>a</sup>  | 0.95±0.14 <sup>abc</sup> | 0.77±0.07 <sup>bcd</sup> | 1.10±0.15 <sup>c</sup>  | 1.05±0.11 <sup>ab</sup>  | 0.67±0.09 <sup>d</sup>   | 0.55±0.07 <sup>b</sup>   | 2.42±0.25 <sup>b</sup>  | 13.75±0.59 <sup>a</sup>    | 0.87 <sup>a</sup>     |
| ALT-12    | 3.5±0.18 <sup>c</sup>   | 1.25±0.12 <sup>abc</sup> | 1.05±0.07 <sup>bc</sup>  | 1.55±0.12 <sup>bc</sup> | 1.02±0.05 <sup>ab</sup>  | 1.60±0.14 <sup>b</sup>   | 1.05±0.06 <sup>a</sup>   | 3.50±0.19 <sup>a</sup>  | 14.52±0.21 <sup>a</sup>    | 0.55 <sup>b</sup>     |
| ALT-6     | 4.32±0.25 <sup>bc</sup> | 1.05±0.14 <sup>abc</sup> | 0.60±0.09 <sup>cd</sup>  | 2.87±0.11 <sup>a</sup>  | 1.0±0.07 <sup>ab</sup>   | 1.67±0.09 <sup>ab</sup>  | 0.07±0.05 <sup>c</sup>   | 2.47±0.21 <sup>ab</sup> | 14.07±0.28 <sup>a</sup>    | 0.87 <sup>a</sup>     |
| COL-1505  | 5.82±0.19 <sup>a</sup>  | 1.12±0.21 <sup>abc</sup> | 1.07±0.16 <sup>bc</sup>  | 1.67±0.18 <sup>bc</sup> | 1.25±0.13 <sup>ab</sup>  | 0.92±0.12 <sup>cd</sup>  | 0.50±0.10 <sup>b</sup>   | 2.25±0.25 <sup>b</sup>  | 14.62±0.35 <sup>a</sup>    | 0.66 <sup>b</sup>     |
| PER-182   | 5.57±0.22 <sup>a</sup>  | 0.67±0.08 <sup>c</sup>   | 1.02±0.07 <sup>bc</sup>  | 1.27±0.11 <sup>c</sup>  | 1.17±0.10 <sup>ab</sup>  | 0.85±0.09 <sup>cd</sup>  | 0.50±0.07 <sup>b</sup>   | 2.15±0.25 <sup>b</sup>  | 13.22±0.40 <sup>a</sup>    | 0.90 <sup>a</sup>     |
| PER-335   | 6.27±0.33 <sup>a</sup>  | 0.72±0.12 <sup>bc</sup>  | 0.45±0.10 <sup>d</sup>   | 2.22±0.23 <sup>ab</sup> | 1.10±0.14 <sup>ab</sup>  | 0.90±0.11 <sup>cd</sup>  | 0.10±0.05 <sup>c</sup>   | 2.75±0.25 <sup>ab</sup> | 14.52±0.38 <sup>a</sup>    | 0.85 <sup>a</sup>     |
| ECU-72    | 3.65±0.13 <sup>bc</sup> | 1.55±0.14 <sup>a</sup>   | 1.20±0.19 <sup>b</sup>   | 1.42±0.09 <sup>c</sup>  | 0.92±0.09 <sup>ab</sup>  | 2.27±0.20 <sup>a</sup>   | 0.0±0.0 <sup>c</sup>     | 2.32±0.28 <sup>b</sup>  | 13.35±0.54 <sup>a</sup>    | 0.90 <sup>a</sup>     |
| ECU-160   | 4.0±0.21 <sup>bc</sup>  | 1.40±0.18 <sup>ab</sup>  | 0.80±0.08 <sup>bcd</sup> | 1.30±0.14 <sup>c</sup>  | 0.80±0.10 <sup>b</sup>   | 1.72±0.23 <sup>ab</sup>  | 0.0±0.0 <sup>c</sup>     | 1.05±0.19 <sup>c</sup>  | 11.07±0.58 <sup>b</sup>    | 0.82 <sup>a</sup>     |
| 60444     | 6.12±0.06 <sup>a</sup>  | 1.30±0.14 <sup>abc</sup> | 0.85±0.12 <sup>bcd</sup> | 1.55±0.18 <sup>bc</sup> | 1.30±0.10 <sup>a</sup>   | 0.95±0.09 <sup>cd</sup>  | 0.75±0.09 <sup>ab</sup>  | 2.27±0.18 <sup>b</sup>  | 15.10±0.28 <sup>a</sup>    | 0.77 <sup>a</sup>     |
| CMC-40    | 4.52±0.18 <sup>b</sup>  | 1.45±0.20 <sup>a</sup>   | 1.85±0.16 <sup>a</sup>   | 1.32±0.15 <sup>c</sup>  | 1.15±0.13 <sup>aba</sup> | 1.35±0.14 <sup>bc</sup>  | 0.15±0.05 <sup>c</sup>   | 2.55±0.25 <sup>ab</sup> | 14.35±0.31 <sup>a</sup>    | 0.75 <sup>a</sup>     |
| F         | 29.67                   | 6.034                    | 12.67                    | 5.172                   | 1.667                    | 32.8                     | 18                       | 5.137                   |                            |                       |
| d.f.      | 9 - 30                  | 9 - 30                   | 9 - 30                   | 9 - 30                  | 9 - 30                   | 9 - 30                   | 9 - 30                   | 9 - 30                  |                            |                       |
| P         | 1.5e <sup>-12</sup> *** | 8.21e <sup>-05</sup> *** | 5.16e <sup>-08</sup> *** | 0.000292 ***            | 0.141                    | 3.96e <sup>-13</sup> *** | 8.46e <sup>-10</sup> *** | 0.000308 ***            |                            |                       |

534 Means within a column followed by the same letter are not significantly different (Tukey's HSD test: P>0.05).
